# Supplementary figures and images for: Canine Angiostrongylus vasorum-Induced Early Innate Immune Reactions Based on NETs Formation and Canine Vascular Endothelial Cell Activation In Vitro
Source: MDPI journal article supplement (doi:10.3390/biology10050427), 2021-05-12

CAEC E-Selectin

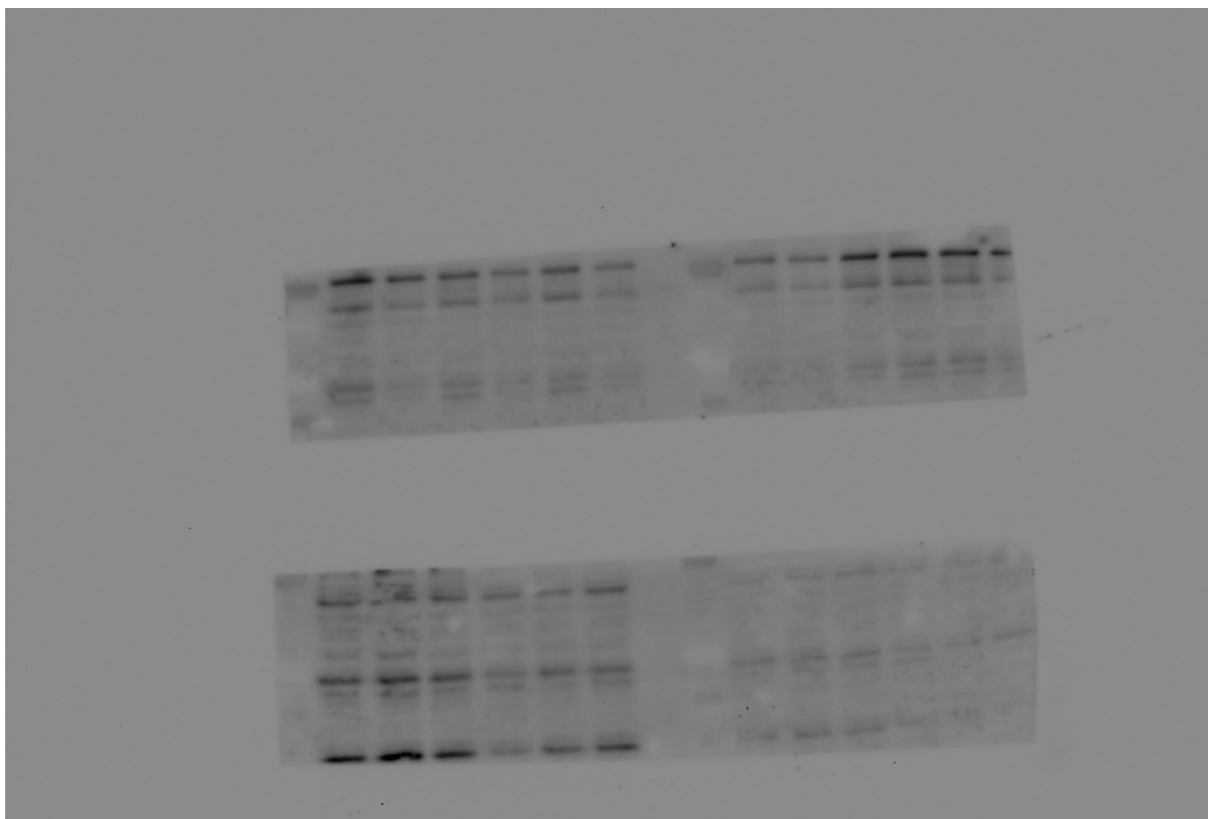

CAEC P-Selectin

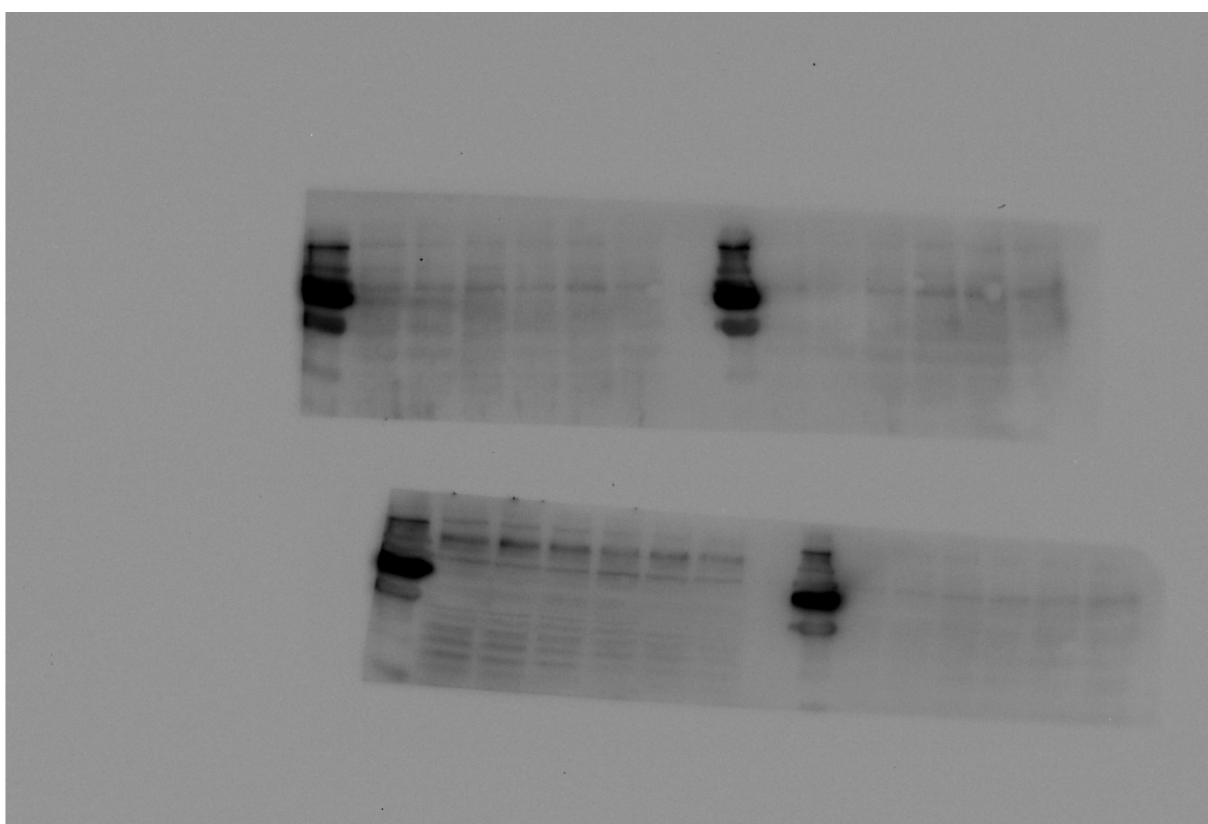

CAEC VCAM-1

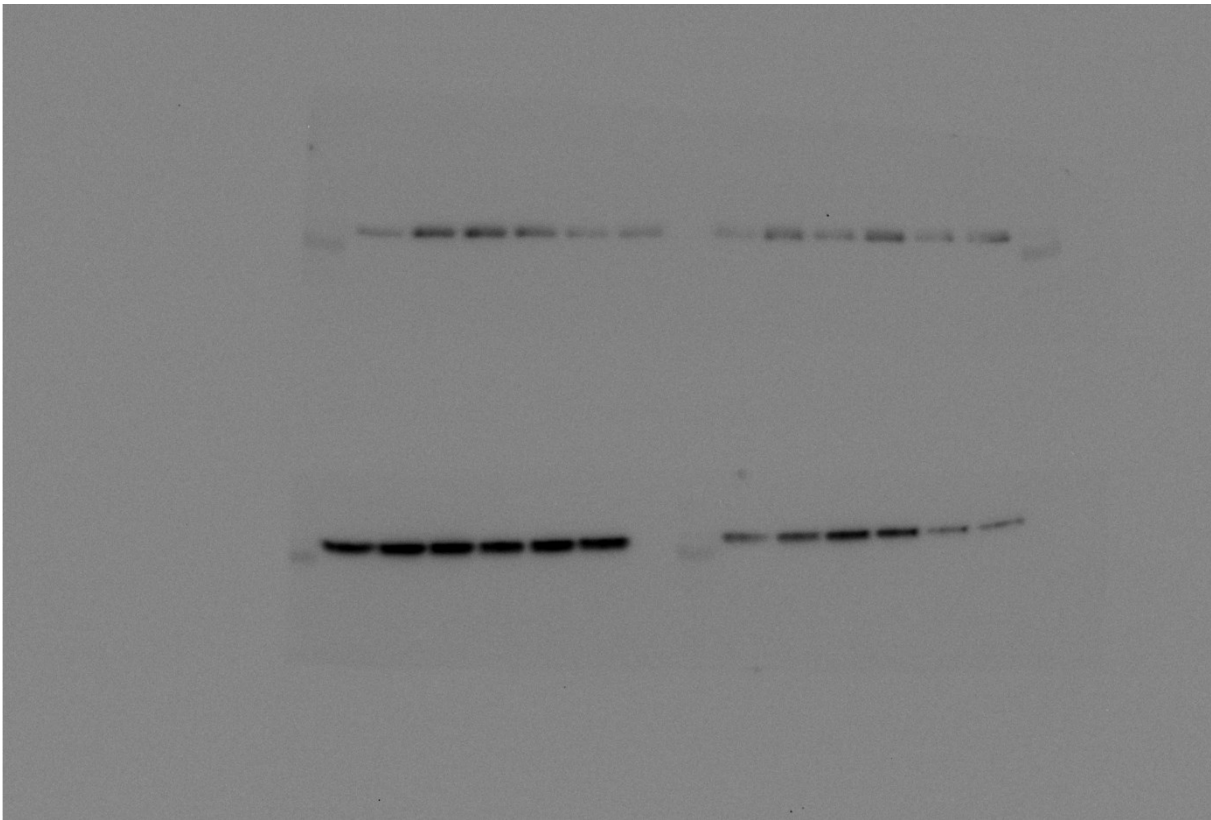

CAEC Vinculin

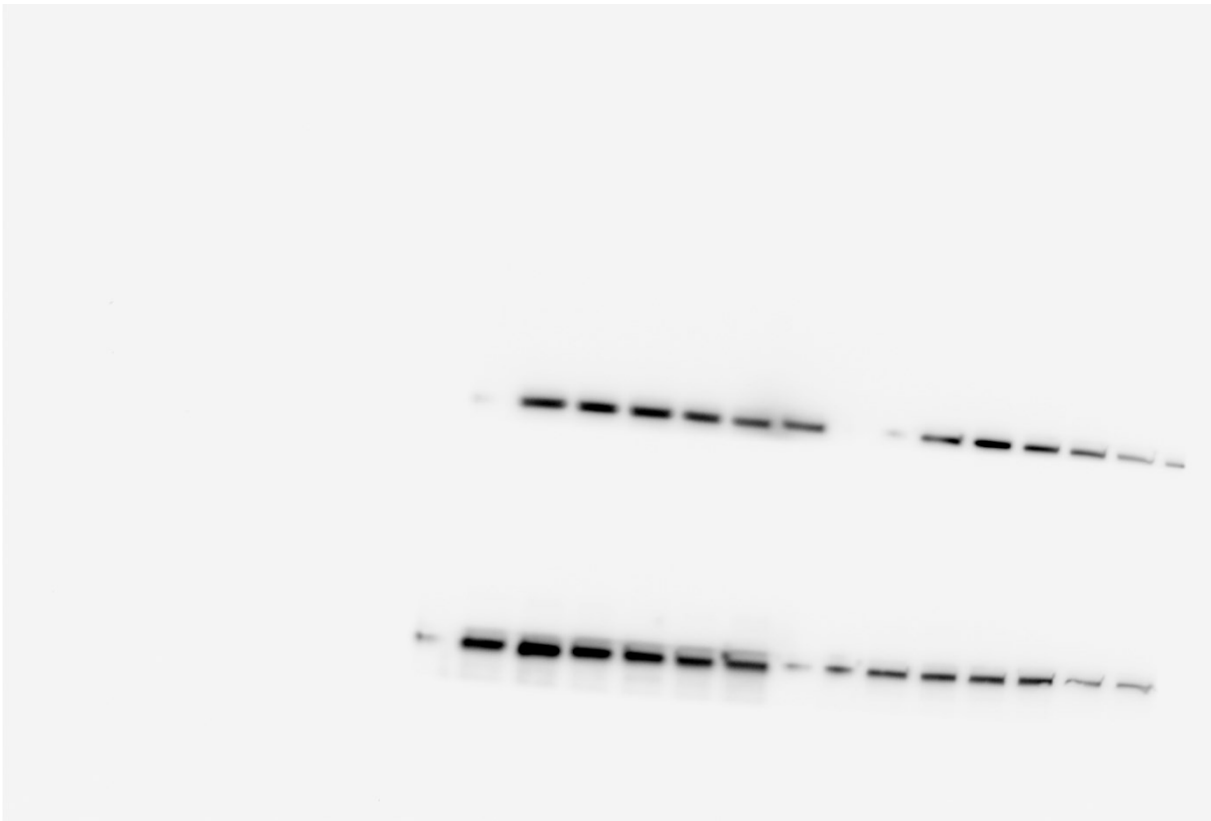

Supplement: s1 [file s1]
